# Supplementary material for: Nanoemulgel for Improved Topical Delivery of Retinyl Palmitate: Formulation Design and Stability Evaluation
Source: MDPI journal article supplement (doi:10.3390/nano10050848), 2020-04-28
Supplement: s1 [file s1]

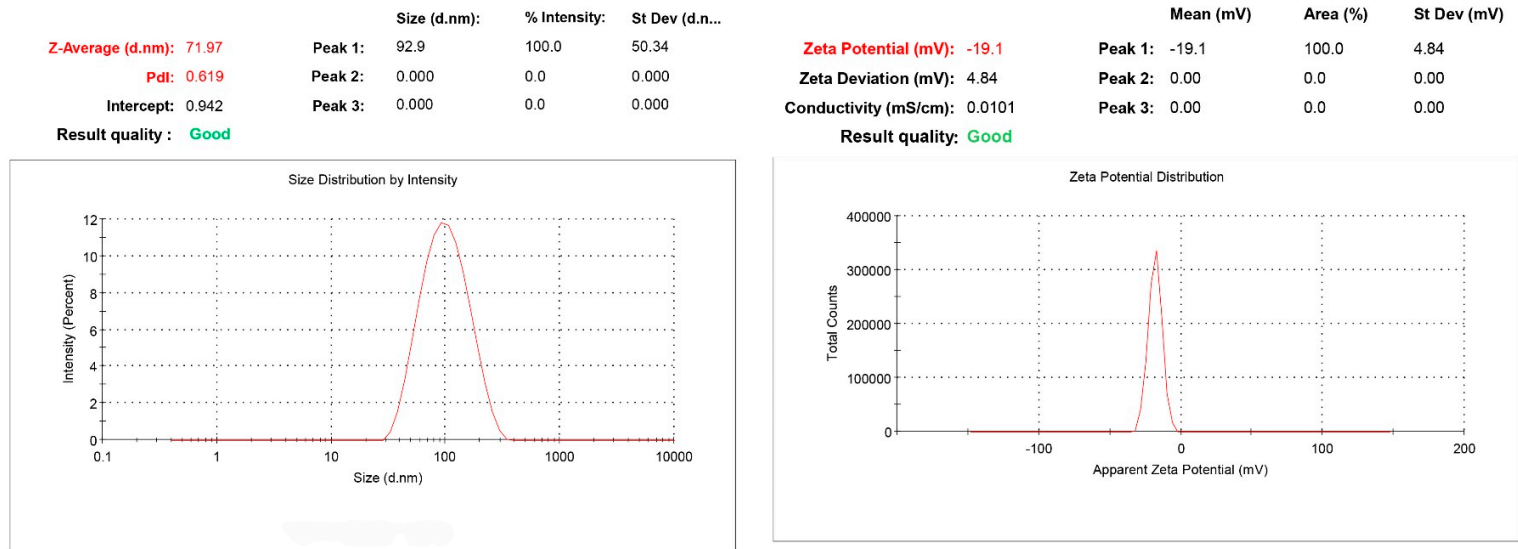

Figure S1: Droplet size (71.97 nm with Pdl 0.619) and zeta potential (-19.1 mV) of NE1

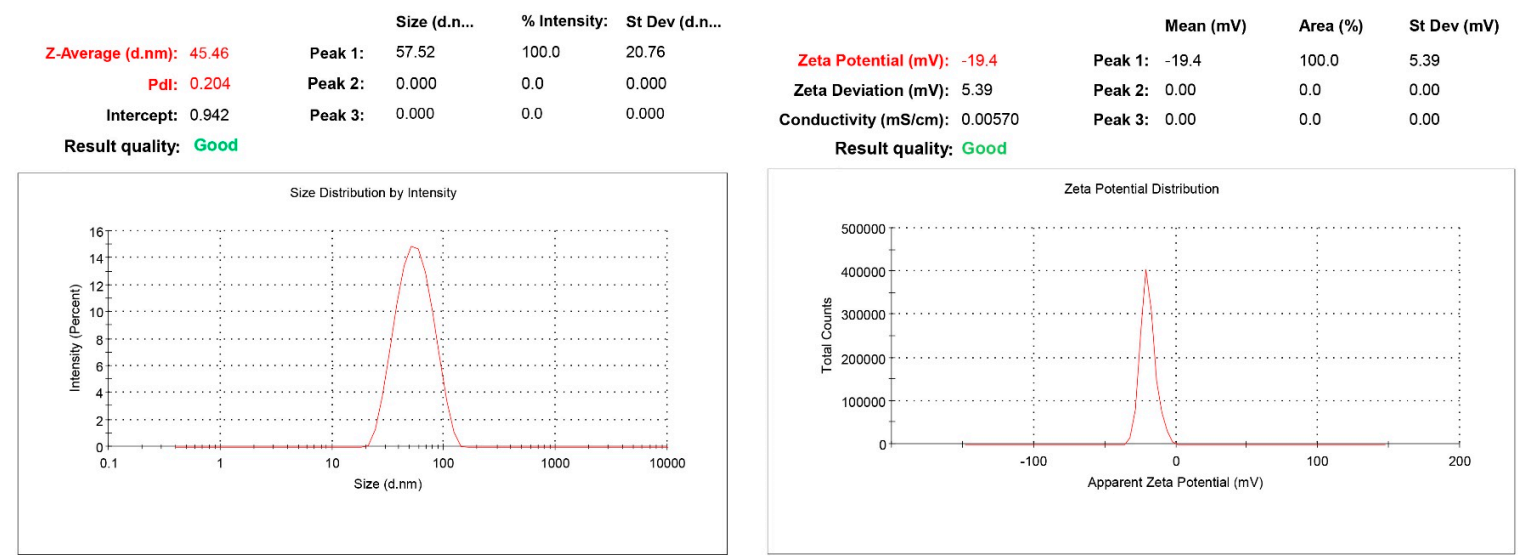

Figure S2: Droplet size (45.46 nm with Pdl 0.204) and zeta potential (-19.4 mV) of NE2

|                                | Size (d.n...         | % Intensity: | St Dev (d.n... |
|--------------------------------|----------------------|--------------|----------------|
| <b>Z-Average (d.nm):</b> 19.06 | <b>Peak 1:</b> 20.87 | 100.0        | 6.746          |
| <b>Pdl:</b> 0.125              | <b>Peak 2:</b> 0.000 | 0.0          | 0.000          |
| <b>Intercept:</b> 0.939        | <b>Peak 3:</b> 0.000 | 0.0          | 0.000          |
| <b>Result quality:</b> Good    |                      |              |                |

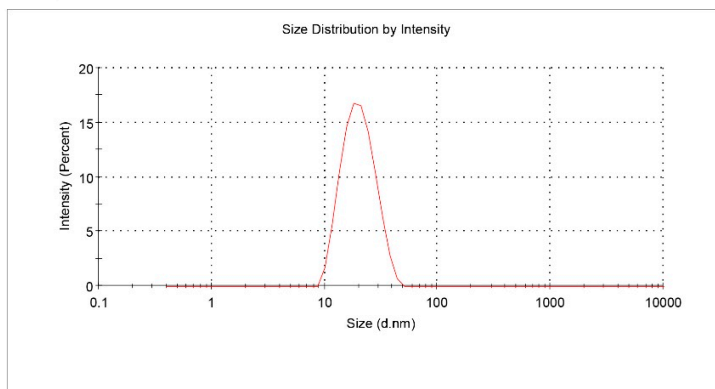

|                                      | Mean (mV)            | Area (%) | St Dev (mV) |
|--------------------------------------|----------------------|----------|-------------|
| <b>Zeta Potential (mV):</b> -20.1    | <b>Peak 1:</b> -20.1 | 100.0    | 4.01        |
| <b>Zeta Deviation (mV):</b> 4.01     | <b>Peak 2:</b> 0.00  | 0.0      | 0.00        |
| <b>Conductivity (mS/cm):</b> 0.00994 | <b>Peak 3:</b> 0.00  | 0.0      | 0.00        |
| <b>Result quality:</b> Good          |                      |          |             |

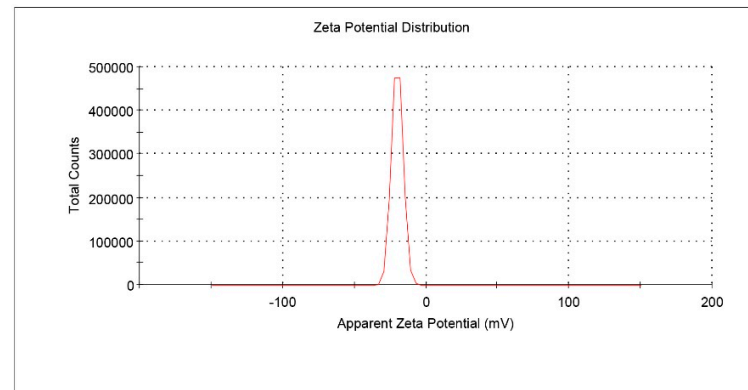

**Figure S3:** Droplet size (19.06 nm with Pdl 0.125) and zeta potential (-20.1 mV) of NE3

|                                | Size (d.n...         | % Intensity: | St Dev (d.n... |
|--------------------------------|----------------------|--------------|----------------|
| <b>Z-Average (d.nm):</b> 16.63 | <b>Peak 1:</b> 17.39 | 100.0        | 4.046          |
| <b>Pdl:</b> 0.016              | <b>Peak 2:</b> 0.000 | 0.0          | 0.000          |
| <b>Intercept:</b> 0.930        | <b>Peak 3:</b> 0.000 | 0.0          | 0.000          |
| <b>Result quality:</b> Good    |                      |              |                |

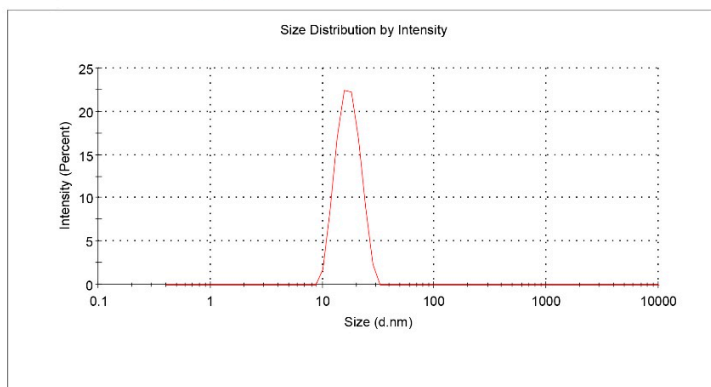

|                                      | Mean (mV)            | Area (%) | St Dev (mV) |
|--------------------------------------|----------------------|----------|-------------|
| <b>Zeta Potential (mV):</b> -20.6    | <b>Peak 1:</b> -20.6 | 100.0    | 5.03        |
| <b>Zeta Deviation (mV):</b> 5.03     | <b>Peak 2:</b> 0.00  | 0.0      | 0.00        |
| <b>Conductivity (mS/cm):</b> 0.00565 | <b>Peak 3:</b> 0.00  | 0.0      | 0.00        |
| <b>Result quality:</b> Good          |                      |          |             |

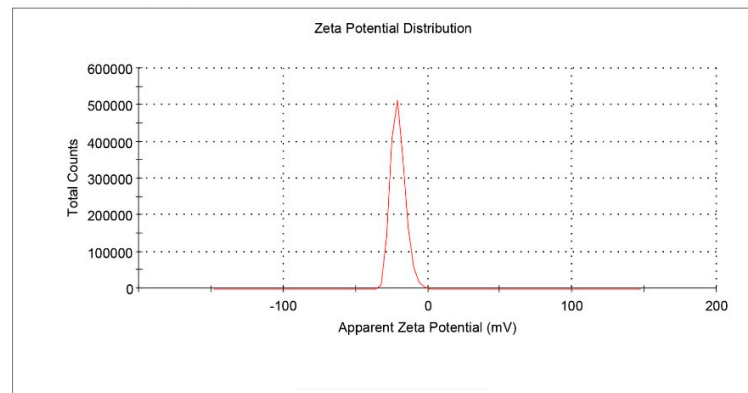

**Figure S4:** Droplet size (16.63 nm with Pdl 0.016) and zeta potential (-20.6 mV) of NE4
